# Supplementary material
Source: PubMed Central journal article supplement (PMC3968502)
Supplement: ASN.2013060575_ASN2013060575SupplementaryData.pdf [file ASN.2013060575_ASN2013060575SupplementaryData.pdf]

**Supplementary Table 1. Characteristics comparing non-African-American and African-American hemodialysis patients.**

|                                            | Non-African-American patients<br>(n=504) | African-Americans (All patients)<br>(n=5,002) | <i>p</i> -value      | African-Americans (HbAA)<br>(n=4,369) | African-Americans Any Hb trait*<br>(n=633) |
|--------------------------------------------|------------------------------------------|-----------------------------------------------|----------------------|---------------------------------------|--------------------------------------------|
| Age                                        | 61.6 (14.3)                              | 59.9 (14.0)                                   | 0.01 <sup>‡</sup>    | 59.8 (14.0)                           | 60.3 (14.1)                                |
| Sex                                        |                                          |                                               |                      |                                       |                                            |
| Male                                       | 279 (55.4)                               | 2,532 (50.6)                                  | 0.04 <sup>‡</sup>    | 2,218 (50.8)                          | 314 (49.6)                                 |
| Female                                     | 225 (44.6)                               | 2,470 (48.4)                                  |                      | 2,151 (49.2)                          | 319 (50.4)                                 |
| Weight (kg) <sup>†</sup>                   | 71.8 (62.1, 86.3)                        | 78.0 (65.1, 94.2)                             | <0.0001 <sup>‡</sup> | 78.0 (65.0, 94.5)                     | 78.0 (65.2, 92.0)                          |
| Hemoglobin (mg/dl)                         | 11.3(0.7)                                | 11.3 (0.7)                                    | 0.69                 | 11.3 (0.7)                            | 11.3 (0.8)                                 |
| ESA dose/treatment (units) <sup>†</sup>    | 4569.2 (2227.3, 8071.1)                  | 4420.6 (2267.3, 7973.8)                       | 0.97                 | 4364.1 (2237.4, 7903.4)               | 4737.4 (2566.0, 8645.5)                    |
| ESA dose/kg/treatment (units) <sup>†</sup> | 60.5 (31.5, 109.5)                       | 56.3 (28.5, 104.2)                            | 0.23                 | 55.5 (27.8, 103.0)                    | 60.5 (33.8, 114.3)                         |
| IV iron dose/treatment (mg) <sup>†</sup>   | 6.4 (4.4, 8.7)                           | 5.7 (4.0, 7.6)                                | <0.0001 <sup>‡</sup> | 5.7 (4, 7.6)                          | 5.7 (3.8, 7.6)                             |
| Number treatments/month <sup>†</sup>       | 12.6 (11.2, 13)                          | 12.7 (11.7, 13)                               | 0.009 <sup>‡</sup>   | 12.6 (11.7, 13)                       | 12.7 (12, 13.1)                            |
| Number treatments total <sup>†</sup>       | 87.5 (72, 91)                            | 88 (80, 91)                                   | 0.0002 <sup>‡</sup>  | 88 (79, 91)                           | 89 (83, 92)                                |
| Missed treatments (%) <sup>†</sup>         | 0 (0, 2.2)                               | 0 (0, 2.4)                                    |                      | 0 (0, 2.5)                            | 0 (0, 2.2)                                 |
| Hospital days/ prescribed txs <sup>‡</sup> | 0 (0, 0.09)                              | 0 (0, 0.07)                                   | 0.03 <sup>‡</sup>    | 0 (0, 0.07)                           | 0 (0, 0.07)                                |
| Dialysis vintage (yrs) <sup>†</sup>        | 1.9 (0.8, 4.2)                           | 3.4 (1.6, 6.2)                                | <0.0001 <sup>‡</sup> | 3.4 (1.6, 6.3)                        | 3.3 (1.5, 6.1)                             |
| Equilibrated Kt/V                          | 1.52 (0.24)                              | 1.46 (0.21)                                   | <0.0001 <sup>‡</sup> | 1.46 (0.21)                           | 1.46 (0.18)                                |
| Albumin (mg/dl)                            | 3.85 (0.37)                              | 3.88 (0.35)                                   |                      | 3.88 (0.35)                           | 3.89 (0.35)                                |
| Ferritin (ng/ml) <sup>†</sup>              | 934.8 (637.5, 1188.5)                    | 1001.5 (710.5, 1262)                          | 0.0002 <sup>‡</sup>  | 1001 (712.1, 1260.6)                  | 1002.5 (683.8, 1285.3)                     |
| Transferrin saturation (%)                 | 33.5 (27.6, 39.9)                        | 34.1 (28.7, 39.8)                             | 0.12                 | 34.5 (8.7)                            | 35.0 (9.3)                                 |
| iPTH (pg/ml) <sup>†</sup>                  | 270.6 (185.1, 469.0)                     | 355.2 (239.5, 560.6)                          | <0.0001 <sup>‡</sup> | 356.4 (239.4, 565.7)                  | 345.6 (243.5, 528.5)                       |
| Vascular access                            |                                          |                                               |                      |                                       |                                            |
| Arteriovenous fistula                      | 232 (46.3)                               | 2,111 (42.3)                                  | <0.001 <sup>‡</sup>  | 1,846 (42.4)                          | 265 (41.9)                                 |
| Arteriovenous graft                        | 99 (19.8)                                | 1,442 (28.9)                                  |                      | 1,251 (28.7)                          | 191 (30.2)                                 |
| Indwelling catheter                        | 170 (33.9)                               | 1,433 (28.7)                                  |                      | 1,256 (28.9)                          | 177 (28.0)                                 |
| Diabetes                                   | 283 (56.2)                               | 2,586 (51.7)                                  | 0.06                 | 2, 245 (51.4)                         | 341 (53.9)                                 |

\*Includes HbAS and HbAC, † Median (IQR), ‡ p<0.05
